# Supplementary material for: Modulation of Extracellular Matrix Composition and Chronic Inflammation with Pirfenidone Promotes Scar Reduction in Retinal Wound Repair
Source: MDPI journal article supplement (doi:10.3390/cells13020164), 2024-01-16
Supplement: s1 [file s1]

## Supplementary materials

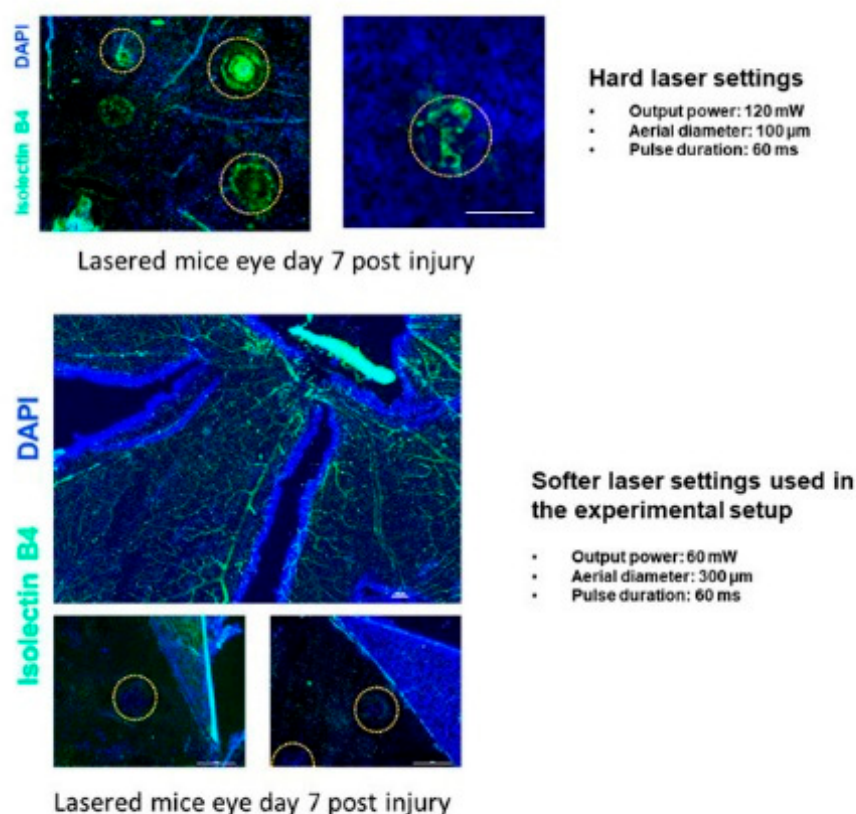

**Supplementary Figure S1:** Isolectin GS-B4 staining for CNV detection without Bruch's membrane rupture after modification of the laser setting. The dotted circles denote the area of the laser spot. The scale bar represents 100  $\mu\text{m}$ .

**Supplementary Table S1: Fold change of ECM component proteins post lasered samples** (significant changes in bold)

|               | Day 7       |         | D21         |         | D35         |         | D49         |         |
|---------------|-------------|---------|-------------|---------|-------------|---------|-------------|---------|
| Gene Symbol   | Fold Change | P-Value |
| <i>Col1a1</i> | 2.93        | 0.26    | 0.41        | 0.40    | 1.02        | 0.55    | 1.21        | 0.73    |
| <i>Col2a1</i> | 1.68        | 0.52    | 0.91        | 0.90    | 1.96        | 0.31    | 2.31        | 0.18    |
| <i>Col3a1</i> | 1.91        | 0.28    | 0.4         | 0.13    | 0.32        | 0.07    | 0.35        | 0.07    |
| <i>Col4a1</i> | 0.58        | 0.12    | 1.11        | 0.62    | 0.72        | 0.17    | 0.74        | 0.21    |
| <i>Col4a2</i> | 0.99        | 0.80    | 0.77        | 0.88    | 1.04        | 0.81    | 1.28        | 0.81    |
| <i>Col4a3</i> | 2.54        | 0.08    | 1.5         | 0.34    | <b>3.15</b> | 0.00    | <b>4.32</b> | 0.01    |

|                |      |      |      |      |              |      |             |      |
|----------------|------|------|------|------|--------------|------|-------------|------|
| <i>Col5a1</i>  | 2.26 | 0.41 | 0.87 | 0.93 | 2.16         | 0.44 | 2.85        | 0.17 |
| <i>Col6a1</i>  | 1.46 | 0.92 | 0.56 | 0.51 | 1.33         | 0.86 | 1.69        | 0.77 |
| <i>Ecm1</i>    | 1.84 | 0.49 | 0.94 | 0.87 | 1.81         | 0.49 | 2.42        | 0.18 |
| <i>Emilin1</i> | 2.02 | 0.55 | 0.89 | 0.90 | 1.72         | 0.82 | 2.23        | 0.41 |
| <i>Fbln1</i>   | 4.89 | 0.22 | 5.45 | 0.13 | <b>12.38</b> | 0.00 | <b>4.35</b> | 0.00 |
| <i>Fn1</i>     | 1.53 | 0.81 | 0.6  | 0.55 | 1.36         | 0.94 | 1.82        | 0.58 |
| <i>Hapln1</i>  | 1.29 | 0.66 | 0.7  | 0.41 | 1.12         | 0.96 | 1.31        | 0.65 |
| <i>Lama1</i>   | 1.72 | 0.67 | 0.8  | 0.65 | 1.56         | 0.85 | 2.15        | 0.37 |
| <i>Lama2</i>   | 1.27 | 0.51 | 0.98 | 0.92 | 0.91         | 0.67 | 1.06        | 0.95 |
| <i>Lama3</i>   | 1.42 | 0.46 | 1.03 | 0.78 | 1.27         | 0.64 | 1.74        | 0.18 |
| <i>Lamb2</i>   | 1.71 | 0.39 | 1.08 | 0.98 | 1.36         | 0.74 | 1.59        | 0.47 |
| <i>Lamb3</i>   | 1.26 | 0.89 | 0.7  | 0.44 | 1.11         | 0.84 | 1.67        | 0.49 |
| <i>Lamc1</i>   | 2.34 | 0.66 | 0.62 | 0.67 | 2.44         | 0.62 | 3.47        | 0.24 |
| <i>Sparc</i>   | 1.46 | 0.82 | 0.88 | 0.77 | 1.11         | 0.72 | 1.27        | 0.92 |
| <i>Spock1</i>  | 1.38 | 0.91 | 0.73 | 0.64 | 1.54         | 0.78 | 1.87        | 0.49 |
| <i>Spp1</i>    | 1.08 | 0.81 | 0.85 | 0.56 | 1.11         | 0.78 | 1.16        | 0.65 |
| <i>Syt1</i>    | 1.52 | 0.63 | 0.6  | 0.54 | 1.5          | 0.67 | 1.95        | 0.29 |
| <i>Tnc</i>     | 1.98 | 0.72 | 0.67 | 0.66 | 1.64         | 1.00 | 2.56        | 0.38 |
| <i>Vcan</i>    | 2.09 | 0.26 | 2.03 | 0.22 | <b>3.76</b>  | 0.00 | <b>2.34</b> | 0.03 |
| <i>Vtn</i>     | 1.56 | 0.51 | 0.78 | 0.72 | 1.52         | 0.54 | 2.03        | 0.17 |

**Supplementary Table S2: Transmembrane and adhesion molecules fold change laser treated samples** (significant changes in bold)

|             | Day 7       |         | D21         |         | D35         |         | D49         |         |
|-------------|-------------|---------|-------------|---------|-------------|---------|-------------|---------|
| Gene Symbol | Fold Change | P-Value |
| <i>Cd44</i> | 1.75        | 0.30    | 1.18        | 0.63    | 1.79        | 0.15    | 1.98        | 0.11    |
| <i>Cdh1</i> | 1.51        | 0.35    | 2.33        | 0.36    | 1.61        | 0.23    | 1.84        | 0.15    |

|               |             |      |      |      |             |      |             |      |
|---------------|-------------|------|------|------|-------------|------|-------------|------|
| <i>Cdh2</i>   | 2.96        | 0.65 | 0.66 | 0.63 | 2.99        | 0.68 | 3.84        | 0.35 |
| <i>Cdh3</i>   | <b>0.68</b> | 0.03 | 0.81 | 0.23 | <b>0.65</b> | 0.01 | 1.03        | 0.77 |
| <i>Cdh4</i>   | 1.82        | 0.70 | 0.6  | 0.66 | 1.91        | 0.65 | 2.59        | 0.25 |
| <i>Cntn1</i>  | 1.29        | 0.61 | 0.63 | 0.48 | 1.29        | 0.59 | 1.5         | 0.29 |
| <i>Ctnna1</i> | 1.66        | 0.54 | 0.75 | 0.76 | 1.59        | 0.61 | 1.83        | 0.39 |
| <i>Ctnna2</i> | 1.34        | 0.76 | 0.65 | 0.59 | 1.27        | 0.89 | 1.6         | 0.47 |
| <i>Ctnnb1</i> | 1.52        | 0.55 | 0.72 | 0.60 | 1.36        | 0.75 | 1.73        | 0.35 |
| <i>Icam1</i>  | <b>3.01</b> | 0.05 | 1.35 | 0.56 | 2.53        | 0.09 | 3.59        | 0.06 |
| <i>Itga2</i>  | 1.34        | 0.47 | 0.62 | 0.54 | 1.06        | 0.99 | 1.64        | 0.12 |
| <i>Itga3</i>  | 1.13        | 0.81 | 0.74 | 0.60 | 0.95        | 0.89 | 1.44        | 0.36 |
| <i>Itga4</i>  | 1.29        | 0.51 | 0.71 | 0.40 | 1.06        | 0.93 | 1.56        | 0.12 |
| <i>Itga5</i>  | 2.04        | 0.66 | 0.7  | 0.70 | 2.04        | 0.68 | 3.06        | 0.24 |
| <i>Itgae</i>  | 1.54        | 0.53 | 1.47 | 0.60 | 1.58        | 0.48 | 2.36        | 0.07 |
| <i>Itgal</i>  | 2.08        | 0.11 | 1.2  | 0.69 | 1.89        | 0.08 | <b>3.69</b> | 0.03 |
| <i>Itgam</i>  | 2.01        | 0.24 | 0.82 | 0.86 | 1.35        | 0.59 | 1.71        | 0.26 |
| <i>Itgav</i>  | 1.23        | 0.60 | 0.67 | 0.50 | 1.27        | 0.47 | 1.59        | 0.15 |
| <i>Itgax</i>  | 1.27        | 0.46 | 1.57 | 0.23 | <b>0.65</b> | 0.01 | 1.28        | 0.27 |
| <i>Itgb1</i>  | 1.36        | 0.63 | 0.69 | 0.65 | 1.3         | 0.74 | 1.52        | 0.45 |
| <i>Itgb2</i>  | 2.34        | 0.16 | 0.84 | 0.95 | 1.84        | 0.15 | 2.11        | 0.11 |
| <i>Itgb3</i>  | 1.43        | 0.76 | 0.65 | 0.65 | 0.93        | 0.56 | 1.65        | 0.52 |
| <i>Itgb4</i>  | 2.07        | 0.68 | 0.73 | 0.65 | 2.2         | 0.59 | 2.83        | 0.28 |
| <i>Ncam1</i>  | 1.91        | 0.50 | 0.73 | 0.71 | 1.94        | 0.47 | 2.53        | 0.19 |
| <i>Ncam2</i>  | 1.08        | 0.87 | 0.57 | 0.36 | 1.07        | 1.00 | 1.28        | 0.54 |
| <i>Pecam1</i> | 1.63        | 0.56 | 0.54 | 0.41 | 1.38        | 0.86 | 2           | 0.29 |
| <i>Postn</i>  | 1.48        | 0.47 | 0.54 | 0.29 | 0.8         | 0.45 | 1.01        | 0.82 |
| <i>Sele</i>   | 0.95        | 0.98 | 1.15 | 0.39 | <b>0.59</b> | 0.00 | 1.06        | 0.48 |
| <i>Sell</i>   | <b>0.7</b>  | 0.01 | 0.88 | 0.68 | <b>0.62</b> | 0.00 | 1.15        | 0.52 |

|              |      |      |      |      |      |      |             |      |
|--------------|------|------|------|------|------|------|-------------|------|
| <i>Selp</i>  | 1.5  | 0.29 | 1.14 | 0.30 | 1.13 | 0.34 | <b>2.23</b> | 0.03 |
| <i>Sgce</i>  | 1.27 | 0.71 | 0.8  | 0.69 | 1.35 | 0.64 | 1.43        | 0.53 |
| <i>Thbs1</i> | 1.29 | 0.92 | 0.62 | 0.57 | 1.48 | 0.72 | 1.22        | 0.92 |
| <i>Thbs2</i> | 2.18 | 0.17 | 1.02 | 0.75 | 1.71 | 0.08 | 1.67        | 0.16 |
| <i>Thbs3</i> | 2.13 | 0.56 | 0.8  | 0.79 | 1.86 | 0.76 | 2.57        | 0.33 |
| <i>Vcam1</i> | 1.52 | 0.50 | 0.71 | 0.57 | 1.35 | 0.71 | 1.61        | 0.39 |

**Supplementary Table S3: Fold change data of ECM protease and inhibitors post laser**  
(significant changes in bold)

|                | Day 7       |         | D21         |         | D35         |         | D49         |         |
|----------------|-------------|---------|-------------|---------|-------------|---------|-------------|---------|
| Gene Symbol    | Fold Change | P-Value |
| <i>Adamts1</i> | 2           | 0.23    | 0.99        | 0.95    | 1.6         | 0.41    | 1.39        | 0.66    |
| <i>Adamts2</i> | 1.44        | 0.40    | 0.73        | 0.43    | 0.97        | 0.85    | 1           | 0.88    |
| <i>Adamts5</i> | 1.61        | 0.31    | 0.93        | 0.93    | 1.27        | 0.52    | 1.68        | 0.11    |
| <i>Adamts8</i> | 1.5         | 0.90    | 0.73        | 0.56    | 1.49        | 0.95    | 2.17        | 0.38    |
| <i>Mmp10</i>   | 0.77        | 0.08    | 0.9         | 0.74    | <b>0.65</b> | 0.01    | 1.34        | 0.30    |
| <i>Mmp11</i>   | 1.67        | 0.51    | 0.69        | 0.90    | 1.77        | 0.40    | 2.34        | 0.16    |
| <i>Mmp12</i>   | 0.97        | 0.85    | 0.94        | 0.89    | 0.88        | 0.54    | 1.44        | 0.36    |
| <i>Mmp13</i>   | 0.97        | 0.94    | 1.22        | 0.47    | 0.96        | 0.99    | 1.62        | 0.12    |
| <i>Mmp14</i>   | 2.05        | 0.74    | 0.71        | 0.66    | 2.25        | 0.62    | 2.65        | 0.40    |
| <i>Mmp15</i>   | 2.17        | 0.74    | 0.62        | 0.65    | 2.03        | 0.87    | 2.75        | 0.45    |
| <i>Mmp1a</i>   | 1.31        | 0.79    | 0.56        | 0.48    | 1.23        | 0.98    | 1.55        | 0.54    |
| <i>Mmp2</i>    | 1.59        | 0.63    | 0.64        | 0.58    | 1.51        | 0.73    | 1.89        | 0.38    |
| <i>Mmp3</i>    | 1.72        | 0.22    | 0.87        | 0.20    | <b>0.79</b> | 0.01    | 1.46        | 0.09    |
| <i>Mmp7</i>    | 0.82        | 0.29    | 0.81        | 0.23    | <b>0.65</b> | 0.01    | 1.07        | 0.60    |
| <i>Mmp8</i>    | <b>0.75</b> | 0.05    | 0.9         | 0.68    | <b>0.65</b> | 0.01    | 1.32        | 0.37    |
| <i>Mmp9</i>    | 1.51        | 0.87    | 0.69        | 0.57    | 1.45        | 1.00    | 1.85        | 0.61    |

|              |      |      |      |      |      |      |      |      |
|--------------|------|------|------|------|------|------|------|------|
| <i>Timp1</i> | 2.06 | 0.35 | 0.8  | 0.73 | 1.51 | 0.79 | 1.91 | 0.41 |
| <i>Timp2</i> | 1.86 | 0.51 | 0.87 | 0.82 | 1.84 | 0.52 | 2.3  | 0.25 |
| <i>Timp3</i> | 1.34 | 0.68 | 0.8  | 0.82 | 1.55 | 0.45 | 1.54 | 0.46 |

**Supplementary Table S4: Fold change of other ECM proteins post laser** (significant changes in bold)

|               | Day 7       |         | D21         |         | D35         |         | D49         |         |
|---------------|-------------|---------|-------------|---------|-------------|---------|-------------|---------|
| Gene Symbol   | Fold Change | P-Value |
| <i>Entpd1</i> | 1.77        | 0.55    | 0.78        | 0.78    | 1.26        | 0.97    | 2.02        | 0.36    |
| <i>Hc</i>     | 0.87        | 0.67    | 0.81        | 0.23    | <b>0.65</b> | 0.01    | 1.14        | 0.11    |
| <i>Tgfb1</i>  | 3.46        | 0.06    | 1.7         | 0.37    | 2.27        | 0.11    | 1.97        | 0.20    |

**Supplementary Table S5: Fold change of ECM components PFD samples** (significant changes in bold)

|               | Day 21 PFD  |         | D35 PFD     |         | D42 PFD     |         | D42 PFD D35 |         |
|---------------|-------------|---------|-------------|---------|-------------|---------|-------------|---------|
| Gene Symbol   | Fold Change | P-Value |
| <i>Cd44</i>   | 1.17        | 0.98    | 1.13        | 0.90    | 1.27        | 0.83    | 0.98        | 0.66    |
| <i>Cdh1</i>   | 0.81        | 0.70    | 0.81        | 0.63    | 0.98        | 0.83    | 0.67        | 0.17    |
| <i>Cdh2</i>   | 1.68        | 0.54    | 1.81        | 0.62    | 1.36        | 0.40    | 1.31        | 0.38    |
| <i>Cdh3</i>   | 0.67        | 0.28    | 0.66        | 0.26    | 0.5         | 0.13    | 0.45        | 0.10    |
| <i>Cdh4</i>   | 1.1         | 0.50    | 1.28        | 0.63    | 1.13        | 0.52    | 1.09        | 0.49    |
| <i>Cntn1</i>  | 0.73        | 0.30    | 0.83        | 0.46    | 0.79        | 0.37    | 0.66        | 0.25    |
| <i>Ctnna1</i> | 0.94        | 0.49    | 1.03        | 0.63    | 0.98        | 0.54    | 0.8         | 0.37    |
| <i>Ctnna2</i> | 0.79        | 0.37    | <b>0.89</b> | 0.50    | 0.81        | 0.39    | 0.74        | 0.33    |
| <i>Ctnnb1</i> | 0.89        | 0.48    | 1.03        | 0.70    | 0.81        | 0.40    | 0.75        | 0.34    |
| <i>Icam1</i>  | 2.64        | 0.09    | <b>2.8</b>  | 0.05    | 1.96        | 0.29    | 2.3         | 0.14    |
| <i>Itga2</i>  | 1.13        | 0.86    | 1.07        | 0.98    | 1.12        | 0.91    | 1.13        | 0.87    |
| <i>Itga3</i>  | 0.7         | 0.27    | 0.79        | 0.36    | 0.74        | 0.30    | 0.69        | 0.24    |

|               |             |      |             |      |             |      |             |      |
|---------------|-------------|------|-------------|------|-------------|------|-------------|------|
| <i>Itga4</i>  | 0.64        | 0.15 | 0.78        | 0.30 | 0.8         | 0.35 | 0.82        | 0.37 |
| <i>Itga5</i>  | 1.19        | 0.52 | 1.48        | 0.76 | 1.37        | 0.64 | 1           | 0.39 |
| <i>Itgae</i>  | 2           | 0.20 | 27.33       | 0.37 | 1.84        | 0.26 | 1.9         | 0.21 |
| <i>Itgal</i>  | 1.23        | 0.93 | 1.43        | 0.81 | 1.19        | 0.90 | 1.04        | 0.73 |
| <i>Itgam</i>  | 1.09        | 0.90 | 1.04        | 0.75 | 0.97        | 0.61 | 0.9         | 0.51 |
| <i>Itgav</i>  | 0.77        | 0.32 | 0.82        | 0.42 | 0.82        | 0.39 | 0.72        | 0.26 |
| <i>Itgax</i>  | 0.87        | 0.57 | 0.72        | 0.38 | 0.59        | 0.18 | 0.66        | 0.27 |
| <i>Itgb1</i>  | 0.82        | 0.42 | 0.91        | 0.55 | 0.84        | 0.43 | 0.82        | 0.41 |
| <i>Itgb2</i>  | <b>2.24</b> | 0.05 | 2.34        | 0.06 | <b>2.38</b> | 0.02 | <b>2.27</b> | 0.02 |
| <i>Itgb3</i>  | <b>4.5</b>  | 0.03 | 3.98        | 0.06 | <b>4.02</b> | 0.02 | <b>3.77</b> | 0.03 |
| <i>Itgb4</i>  | 1.13        | 0.50 | 1.27        | 0.54 | 1.35        | 0.61 | 1.13        | 0.45 |
| <i>Ncam1</i>  | 1.13        | 0.62 | 1.32        | 0.83 | 1.19        | 0.67 | 1.11        | 0.58 |
| <i>Ncam2</i>  | 0.59        | 0.16 | 0.77        | 0.34 | 0.7         | 0.24 | 0.67        | 0.21 |
| <i>Pecam1</i> | 0.82        | 0.39 | 0.88        | 0.43 | 0.76        | 0.34 | 0.84        | 0.40 |
| <i>Postn</i>  | 0.44        | 0.13 | 0.54        | 0.17 | 0.45        | 0.13 | 0.43        | 0.12 |
| <i>Sele</i>   | <b>3.66</b> | 0.02 | <b>3.71</b> | 0.05 | <b>3.49</b> | 0.01 | <b>3.23</b> | 0.00 |
| <i>Sell</i>   | 2.2         | 0.07 | 2.46        | 0.09 | <b>2.29</b> | 0.01 | <b>2.38</b> | 0.04 |
| <i>Selp</i>   | 3.93        | 0.01 | <b>3.27</b> | 0.01 | <b>3.35</b> | 0.02 | <b>2.76</b> | 0.01 |
| <i>Sgce</i>   | <b>0.62</b> | 0.22 | 0.73        | 0.35 | 0.61        | 0.21 | 0.56        | 0.18 |
| <i>Thbs1</i>  | 1.04        | 0.61 | 0.83        | 0.40 | 0.83        | 0.39 | 0.66        | 0.27 |
| <i>Thbs2</i>  | 1           | 0.86 | 0.94        | 0.65 | 0.74        | 0.29 | 0.94        | 0.64 |
| <i>Thbs3</i>  | 1.56        | 0.91 | 1.7         | 0.96 | 1.51        | 0.85 | 1.51        | 0.85 |

**Supplementary Table S6: Fold change of Transmembrane and adhesion molecules PFD samples (significant changes in bold)**

|                | Day 21 PFD  |         | D35 PFD     |         | D42 PFD     |         | D42 PFD D35 |         |
|----------------|-------------|---------|-------------|---------|-------------|---------|-------------|---------|
| Gene Symbol    | Fold Change | P-Value |
| <i>Col1a1</i>  | 1.88        | 0.66    | 1.78        | 0.75    | 1.81        | 0.74    | 1.75        | 0.81    |
| <i>Col2a1</i>  | 1.35        | 0.87    | 1.52        | 0.61    | 1.21        | 0.91    | 1.02        | 0.64    |
| <i>Col3a1</i>  | 0.39        | 0.04    | <b>0.29</b> | 0.02    | <b>0.32</b> | 0.02    | <b>0.28</b> | 0.02    |
| <i>Col4a1</i>  | <b>0.4</b>  | 0.0001  | <b>0.42</b> | 0.0010  | <b>0.39</b> | 0.0001  | <b>0.35</b> | 0.0001  |
| <i>Col4a2</i>  | 0.48        | 0.17    | 0.66        | 0.26    | 0.57        | 0.21    | 0.54        | 0.19    |
| <i>Col4a3</i>  | 1.92        | 0.12    | 2.03        | 0.10    | <b>2.47</b> | 0.05    | <b>2.74</b> | 0.01    |
| <i>Col5a1</i>  | 1.11        | 0.55    | 1.34        | 0.78    | 1.18        | 0.61    | 1.08        | 0.52    |
| <i>Col6a1</i>  | 1.15        | 0.59    | 1.28        | 0.71    | 1.06        | 0.51    | 1.05        | 0.50    |
| <i>Ecm1</i>    | 1.15        | 0.71    | 1.17        | 0.75    | 1.02        | 0.56    | 0.94        | 0.48    |
| <i>Emilin1</i> | 1.5         | 0.86    | 1.46        | 0.86    | 1.46        | 0.82    | 1.51        | 0.87    |
| <i>Fn1</i>     | 0.94        | 0.44    | 1.04        | 0.55    | 0.87        | 0.38    | 0.77        | 0.32    |
| <i>Hapln1</i>  | 0.61        | 0.28    | 0.84        | 0.48    | 0.7         | 0.32    | 0.67        | 0.29    |
| <i>Lama1</i>   | 1.01        | 0.48    | 1.13        | 0.60    | 0.84        | 0.37    | 0.89        | 0.39    |
| <i>Lama2</i>   | 0.5         | 0.09    | 0.52        | 0.07    | <b>0.43</b> | 0.05    | 0.52        | 0.06    |
| <i>Lama3</i>   | 0.87        | 0.50    | 1.03        | 0.84    | 0.8         | 0.38    | 0.87        | 0.50    |
| <i>Lamb2</i>   | 1.35        | 0.79    | 1.4         | 0.72    | 1.14        | 0.86    | 1.07        | 0.73    |
| <i>Lamb3</i>   | 2.81        | 0.10    | 2.46        | 0.16    | 2.11        | 0.27    | 2.1         | 0.26    |
| <i>Lamc1</i>   | 1.47        | 0.66    | 1.65        | 0.78    | 1.42        | 0.61    | 1.33        | 0.55    |
| <i>Sparc</i>   | 0.74        | 0.32    | 0.73        | 0.35    | 0.57        | 0.23    | 0.54        | 0.21    |
| <i>Spock1</i>  | 0.68        | 0.28    | 0.85        | 0.44    | 0.78        | 0.35    | 0.69        | 0.29    |
| <i>Syt1</i>    | 0.87        | 0.46    | 1.09        | 0.73    | 1.04        | 0.66    | 1.02        | 0.62    |
| <i>Tnc</i>     | 1.03        | 0.42    | 1.38        | 0.69    | 1.14        | 0.47    | 0.89        | 0.33    |
| <i>Vcan</i>    | 0.88        | 0.98    | 0.65        | 0.06    | 0.75        | 0.88    | 0.87        | 0.99    |
| <i>Vtn</i>     | 1.07        | 0.73    | 1.17        | 0.97    | 0.9         | 0.51    | 1.62        | 0.47    |

**Supplementary Table S7: Fold change of ECM protease and inhibitors PFD samples**  
(significant changes in bold)

|                | Day 21 PFD  |         | D35 PFD     |         | D42 PFD     |         | D42 PFD D35 |         |
|----------------|-------------|---------|-------------|---------|-------------|---------|-------------|---------|
| Gene Symbol    | Fold Change | P-Value |
| <i>Adamts1</i> | 0.87        | 0.46    | 1.11        | 0.82    | 0.81        | 0.41    | 0.67        | 0.27    |
| <i>Adamts2</i> | 1.36        | 0.51    | 1.17        | 0.84    | 1.34        | 0.50    | 0.96        | 0.68    |
| <i>Adamts5</i> | 0.88        | 0.51    | 0.92        | 0.61    | 0.8         | 0.36    | 0.75        | 0.29    |
| <i>Adamts8</i> | 1.95        | 0.55    | 2.28        | 0.31    | 2.07        | 0.46    | 1.77        | 0.72    |
| <i>Mmp10</i>   | 1.51        | 0.30    | <b>2.25</b> | 0.04    | 1.52        | 0.22    | 1.51        | 0.24    |
| <i>Mmp11</i>   | 1.18        | 0.83    | 1.11        | 0.70    | 1.18        | 0.81    | 1.01        | 0.57    |
| <i>Mmp12</i>   | 2.07        | 0.10    | <b>2.16</b> | 0.05    | 2.18        | 0.06    | <b>2.09</b> | 0.04    |
| <i>Mmp13</i>   | 1.6         | 0.11    | 1.83        | 0.17    | 1.28        | 0.33    | 1.32        | 0.26    |
| <i>Mmp14</i>   | 0.78        | 0.28    | 0.83        | 0.31    | 0.93        | 0.34    | 0.64        | 0.23    |
| <i>Mmp15</i>   | 1.21        | 0.48    | 1.37        | 0.56    | 1.32        | 0.53    | 1.07        | 0.39    |
| <i>Mmp1a</i>   | 0.71        | 0.31    | 0.92        | 0.51    | 0.87        | 0.46    | 0.82        | 0.40    |
| <i>Mmp2</i>    | 1.09        | 0.65    | 1.15        | 0.74    | 1.12        | 0.67    | 0.88        | 0.43    |
| <i>Mmp3</i>    | 1.1         | 0.84    | 0.88        | 0.77    | 0.63        | 0.25    | 0.6         | 0.24    |
| <i>Mmp7</i>    | 1.98        | 0.11    | <b>2.43</b> | 0.03    | 1.67        | 0.15    | <b>1.92</b> | 0.05    |
| <i>Mmp8</i>    | <b>3.17</b> | 0.04    | <b>3.56</b> | 0.03    | <b>3.26</b> | 0.00    | <b>3.03</b> | 0.01    |
| <i>Mmp9</i>    | 0.82        | 0.36    | 1.12        | 0.59    | 0.94        | 0.43    | 0.87        | 0.38    |
| <i>Timp1</i>   | 2.69        | 0.20    | 3.16        | 0.10    | 3.07        | 0.10    | 2.4         | 0.27    |
| <i>Timp2</i>   | 0.97        | 0.50    | 1.12        | 0.65    | 0.95        | 0.47    | 0.93        | 0.46    |
| <i>Timp3</i>   | 0.81        | 0.39    | 0.76        | 0.38    | 0.76        | 0.34    | 0.67        | 0.27    |



**Supplementary Table S8: Fold change of other ECM proteins PFD samples (significant changes in bold)**

|               | Day 21 PFD  |         | D35 PFD     |         | D42 PFD     |         | D42 PFD D35 |         |
|---------------|-------------|---------|-------------|---------|-------------|---------|-------------|---------|
| Gene Symbol   | Fold Change | P-Value |
| <i>Ctgf</i>   | 0.55        | 0.14    | 0.86        | 0.49    | 0.6         | 0.15    | 0.64        | 0.18    |
| <i>Entpd1</i> | 1.69        | 0.66    | 1.67        | 0.69    | 1.69        | 0.67    | 1.53        | 0.86    |
| <i>Hc</i>     | 1.02        | 0.96    | 1.26        | 0.57    | 1.04        | 0.98    | 1.01        | 0.86    |
| <i>Tgfb1</i>  | <b>2.9</b>  | 0.04    | <b>3.16</b> | 0.04    | <b>3.01</b> | 0.02    | <b>2.7</b>  | 0.03    |
